# Supplementary material for: The Mitochondrial Genome Impacts Respiration but Not Fermentation in Interspecific Saccharomyces Hybrids
Source: PLoS One. 2013 Sep 23;8(9):e75121. doi: 10.1371/journal.pone.0075121 (PMC3781082; doi:10.1371/journal.pone.0075121)
Supplement: Table S2 — mtDNA inheritance for two inter-specific crosses between S. cerevisiae x S. uvarum. ND: not detected. (XLSX) [file pone.0075121.s003.xlsx]

## Sheet: Feuil1
Table S2. mtDNA inheritance for two inter-specific crosses between S. cerevisiae x S. uvarum.
Strain	Respiration	Comment	ATP6	COX2	COX3		Respiration	Comment	ATP6	COX2	COX3
	G20 hybrids						G80 hybrids
WU12-1	+	Heteroplasmy	Su	Su/Sc	Su		+	Homoplasmy	Su	Su	Su
WU12-2	+	Homoplasmy	Su	Su	Su		+	Homoplasmy	Su	Su	Su
WU12-3	+	Homoplasmy	Su	Su	Su		+	Homoplasmy	Su	Su	Su
WU12-4	+	Homoplasmy	Sc	Sc	Sc		+	Homoplasmy	Sc	Sc	Sc
WU12-5	+	Homoplasmy	Sc	Sc	Sc		+	Homoplasmy	Sc	Sc	Sc
WU12-6	+	Homoplasmy	Sc	Sc	Sc		+	Homoplasmy	Sc	Sc	Sc
WU12-7	+	Homoplasmy	Sc	Sc	Sc		+	Homoplasmy	Sc	Sc	Sc
WU12-8	+	Homoplasmy	Sc	Sc	Sc		+	Homoplasmy	Sc	Sc	Sc
WU12-9	+	Homoplasmy	Sc	Sc	Sc		+	Homoplasmy	Sc	Sc	Sc
WU12-10	+	Homoplasmy	Sc	Sc	Sc		+	Homoplasmy	Sc	Sc	Sc
DU23-1	+	Homoplasmy	Sc	Sc	Sc		+	Homoplasmy	Sc	Sc	Sc
DU23-2	-	Heteroplasmy	Su	Su/Sc	Su		-	Recombination	Su	Su	Sc
DU23-3	+	Homoplasmy	Su	Su	Su		+	Homoplasmy	Su	Su	Su
DU23-4	+	Homoplasmy	Su	Su	Su		+	Homoplasmy	Su	Su	Su
DU23-5	-	Recombination	Su	Sc	Sc		-	mtDNA lost	ND	ND	ND
DU23-6	-	Recombination	Su	Su	Sc		-	mtDNA lost	ND	Su	Sc
DU23-7	-	Heteroplasmy	Su/Sc	Sc	Sc		-	mtDNA lost	Sc/Su	ND	ND
DU23-8	+	Recombination	Su	Su	Sc		+	Recombination	Su	Su	Sc
DU23-9	+	Homoplasmy	Sc	Sc	Sc		+	Homoplasmy	Sc	Sc	Sc
DU23-10	-	Homoplasmy	Sc	Sc	Sc		-	mtDNA lost	ND	ND	ND
ND: not detected
